# Supplementary material
Source: Springer Nature journal article supplement (https://www.springermedizin.de/resource/supplementary/12885_2007_981_MOESM1_ESM.pdf/9471822)
Supplement: MOESM1 [file 9471822]

(A) H&E of tissue microarray

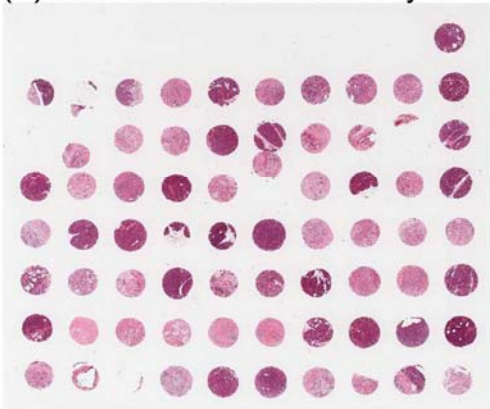

(B) Pooled secondary antibody label

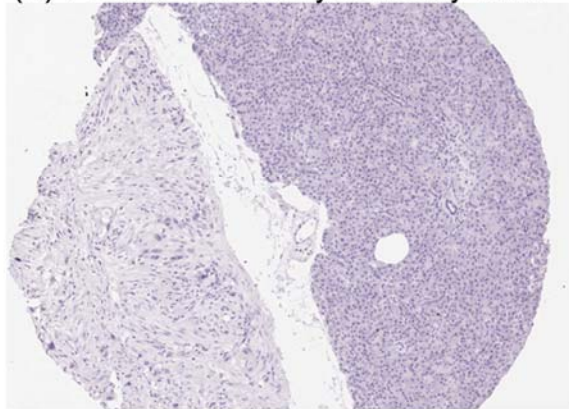

**Additional Figure 1 Tissue microarray.** (A) An H&E stained TMA slide containing 1.5 mm specimen cores. (B) A representative tissue core shows no staining in the absence of primary antibodies. Images were captured using an Aperio CS scanner.

**Additional Table 1A Summary of clinical parameters**

| Clinical Parameters             |          |         |
|---------------------------------|----------|---------|
|                                 | No. (%)  |         |
|                                 | Control* | PDAC    |
| <b>Surgery</b>                  |          |         |
| Whipple procedure               | 12 (100) | 22 (85) |
| Distal pancreatectomy           | -        | 4 (15)  |
| Total                           | 12       | 26      |
| <b>Age at diagnosis (years)</b> |          |         |
| Median                          | 67       | 58      |
| Range                           | 39-76    | 41-75   |
| <b>Sex</b>                      |          |         |
| Female                          | 4 (31)   | 13 (50) |
| Male                            | 8 (67)   | 13 (50) |
| <b>Stage</b>                    |          |         |
| I                               | -        | 1 (4)   |
| II                              | -        | 9 (34)  |
| III                             | -        | 14 (54) |
| IV                              | -        | 2 (8)   |
| <b>Grade</b>                    |          |         |
| Well                            | -        | 3 (11)  |
| Moderate                        | -        | 14 (54) |
| Poor                            | -        | 9 (35)  |

\*Control specimens included one adenoma of the duodenum and jejunum, and five carcinomas of Ampulla of Vater and six carcinomas of bile duct.

**Additional Table 1B Clinicopathological parameters of PDAC cases**

| <b>Tumor case ID</b> | <b>Sex</b> | <b>Age</b> | <b>Tumor stage</b> | <b>Tumor grade</b> |
|----------------------|------------|------------|--------------------|--------------------|
| A2/A2                | M          | 65         | pT3N1aMx           | 3                  |
| A3                   | F          | 68         | pT3N1aMx           | 2                  |
| A5/B5                | M          | 55         | pT3N0Mx            | 2                  |
| B3                   | F          | 54         | T2N1               | 3                  |
| B4/A4                | F          | 57         | pT1N1aM0           | 1                  |
| B6                   | F          | 41         | T3N1b              | 2                  |
| C3                   | M          | 51         | pT4N0Mx            | 3                  |
| C4/D4                | F          | 58         | pT3N1bMx           | 2                  |
| D2/D2                | M          | 64         | T2N1a              | 2                  |
| D3                   | M          | 63         | T3N                | 3                  |
| D8                   | M          | 62         | T3N1bMx            | 2                  |
| E4                   | F          | 53         | T3N1               | 2                  |
| E6/D5                | M          | 57         | T3N1 aMx           | 2                  |
| E7/G7                | M          | 63         | T3N0               | 2                  |
| F2/G2                | M          | 63         | T2N1               | 1                  |
| F4                   | M          | 47         | T3N1               | 2                  |
| G3                   | F          | 66         | pT3N1bM0           | 2                  |
| G5                   | F          | 58         | pT2N1aMx           | 1                  |
| G8                   | M          | 53         | T3                 | 3                  |
| H5                   | F          | 58         | pT3N0Mx            | 3                  |
| H8                   | M          | 75         | T3N0               | 3                  |
| I2/J2                | F          | 54         | T3N1               | 2                  |
| I4/H4                | M          | 66         | pT3N0Mx            | 2                  |
| I6/F5                | F          | 50         | T3N1M1             | 3                  |
| J5/E2                | F          | 68         | pT3pN0             | 3                  |
| J8                   | F          | 69         | T2N0               | 2                  |
